# Supplementary material for: Warm protons at comet 67P/Churyumov–Gerasimenko – implications for the infant bow shock
Source: Copernicus journal article supplement (doi:10.5194/angeo-39-379-2021), 2021-05-05
Supplement: Supplementary file 1 [file angeo-39-379-2021-supplement.zip]

Archive with 2 entries (2 files):
- events_all.txt
- angeo-39-379-2021-supplement-title-page.pdf
