# Supplementary material for: Warm protons at comet 67P/Churyumov–Gerasimenko – implications for the infant bow shock
Source: Copernicus journal article supplement (doi:10.5194/angeo-39-379-2021), 2021-05-05
Supplement: Supplementary file 1 [file angeo-39-379-2021-supplement.zip › angeo-39-379-2021-supplement-title-page.pdf]

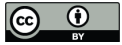

*Supplement of*

## **Warm protons at comet 67P/Churyumov–Gerasimenko – implications for the infant bow shock**

**Charlotte Goetz et al.**

*Correspondence to:* Charlotte Goetz ([charlotte.goetz@esa.int](mailto:charlotte.goetz@esa.int))

- [angeo-39-379-2021-supplement-title-page.pdf](#)
- [events\\_all.txt](#)

The copyright of individual parts of the supplement might differ from the article licence.
