# Supplementary material for: Warm protons at comet 67P/Churyumov–Gerasimenko – implications for the infant bow shock
Source: Copernicus journal article supplement (doi:10.5194/angeo-39-379-2021), 2021-05-05
Supplement: Supplementary file 1 [file angeo-39-379-2021-supplement.zip › events_all.txt]

2014-11-27T03:55:08.850	2014-11-27T06:41:38.573
2014-12-07T03:48:50.854	2014-12-07T05:51:25.138
2014-12-23T15:45:39.325	2014-12-23T20:09:01.612
2014-12-24T03:33:55.339	2014-12-24T23:41:23.363
2014-12-25T00:32:35.364	2014-12-25T01:57:55.366
2014-12-25T09:30:11.000	2014-12-25T11:55:15.378
2014-12-28T02:34:11.452	2014-12-28T23:51:57.759
2015-01-03T03:06:05.937	2015-01-03T06:59:41.910
2015-01-04T12:19:09.945	2015-01-04T15:15:09.948
2015-01-04T19:55:09.954	2015-01-04T22:39:31.957
2015-01-05T00:33:33.897	2015-01-05T02:15:57.993
2015-01-05T10:36:19.690	2015-01-05T16:15:58.009
2015-01-06T05:32:13.994	2015-01-06T11:04:03.719
2015-01-13T19:08:19.929	2015-01-13T20:20:51.930
2015-01-14T02:19:15.937	2015-01-14T04:10:11.939
2015-01-14T06:52:19.943	2015-01-14T07:26:27.943
2015-01-14T08:16:30.163	2015-01-14T08:38:54.226
2015-01-14T12:59:15.950	2015-01-14T15:24:19.953
2015-01-14T17:02:27.955	2015-01-14T17:32:19.955
2015-01-14T18:14:59.956	2015-01-14T19:01:55.957
2015-01-15T00:06:54.244	2015-01-15T11:53:07.977
2015-01-15T19:22:06.298	2015-01-15T19:54:06.205
2015-01-19T13:18:28.093	2015-01-19T14:26:44.094
2015-01-20T00:22:22.325	2015-01-20T01:48:46.420
2015-01-21T14:52:20.152	2015-01-21T19:25:24.157
2015-01-22T03:50:54.386	2015-01-22T05:04:30.450
2015-01-22T13:46:12.179	2015-01-22T16:32:36.182
2015-01-23T15:34:22.522	2015-01-23T17:45:34.431
2015-01-23T18:52:46.526	2015-01-23T19:47:10.496
2015-01-27T00:04:52.300	2015-01-27T23:58:28.328
2015-01-29T00:00:36.356	2015-01-29T06:33:08.363
2015-01-29T07:24:20.364	2015-01-29T17:21:40.376
2015-01-29T18:31:58.658	2015-01-29T23:54:12.383
2015-01-30T00:23:58.603	2015-01-30T08:47:58.644
2015-01-30T14:50:12.401	2015-01-30T22:43:10.691
2015-01-31T05:02:22.698	2015-01-31T08:55:58.640
2015-01-31T11:05:34.674	2015-01-31T14:46:22.679
2015-01-31T21:34:22.749	2015-01-31T21:53:34.749
2015-02-01T00:07:58.721	2015-02-01T01:27:58.722
2015-02-01T14:01:34.768	2015-02-01T14:52:46.738
2015-02-07T15:10:22.846	2015-02-07T16:36:46.879
2015-02-08T03:32:46.951	2015-02-08T04:46:22.921
2015-02-10T20:12:20.724	2015-02-10T21:12:04.725
2015-02-10T21:54:44.726	2015-02-10T23:37:08.728
2015-02-11T06:47:58.989	2015-02-11T11:58:22.964
2015-02-11T15:08:46.936	2015-02-11T17:23:11.002
2015-02-11T00:11:16.728	2015-02-11T02:02:12.731
2015-02-11T04:01:40.733	2015-02-11T19:36:04.752
2015-02-12T02:34:07.072	2015-02-12T05:59:00.764
2015-02-12T21:33:19.032	2015-02-12T22:43:43.003
2015-02-15T17:23:48.863	2015-02-15T20:01:40.866
2015-02-17T01:02:28.901	2015-02-17T23:52:04.928
2015-02-18T00:00:36.928	2015-02-18T22:28:52.956
2015-02-19T00:11:16.957	2015-02-19T02:49:08.960
2015-02-19T12:03:48.971	2015-02-19T17:23:48.978
2015-02-20T03:16:52.989	2015-02-20T05:07:48.992
2015-02-20T08:53:19.277	2015-02-20T10:16:31.310
2015-02-20T10:48:31.217	2015-02-20T11:20:31.218
2015-02-20T12:11:43.313	2015-02-20T12:43:43.219
2015-02-21T00:19:49.014	2015-02-21T07:09:25.023
2015-02-21T11:47:11.273	2015-02-21T13:10:23.244
2015-02-24T04:35:11.350	2015-02-24T09:03:59.418
2015-02-24T11:14:45.108	2015-02-24T12:40:05.110
2015-02-24T17:25:57.115	2015-02-24T19:38:13.118
2015-02-25T06:01:09.130	2015-02-25T09:08:53.134
2015-02-25T11:55:17.137	2015-02-25T13:29:09.139
2015-02-25T16:25:35.455	2015-02-25T19:53:09.147
2015-02-28T15:23:11.439	2015-02-28T17:56:47.473
2015-03-01T17:45:03.469	2015-03-01T19:11:27.565
2015-03-01T20:09:03.535	2015-03-01T21:19:27.536
2015-03-02T01:04:37.259	2015-03-02T13:44:05.273
2015-03-02T16:17:41.276	2015-03-02T20:59:17.282
2015-03-03T00:11:17.285	2015-03-03T10:04:21.297
2015-03-04T00:00:37.313	2015-03-04T23:58:29.340
2015-03-05T00:05:51.653	2015-03-05T15:30:07.639
2015-03-05T21:26:55.677	2015-03-05T23:57:19.680
2015-03-06T00:16:31.680	2015-03-06T05:12:05.374
2015-03-06T12:05:57.381	2015-03-06T19:09:19.702
2015-03-07T05:48:21.402	2015-03-07T07:00:53.403
2015-03-07T10:38:29.407	2015-03-07T13:24:53.410
2015-03-07T15:49:57.413	2015-03-07T18:27:49.416
2015-03-08T00:20:47.642	2015-03-08T05:29:09.429
2015-03-08T07:02:23.743	2015-03-08T07:32:53.431
2015-03-08T09:10:23.683	2015-03-08T10:49:35.716
2015-03-08T14:11:11.751	2015-03-08T15:18:23.659
2015-03-10T05:50:29.484	2015-03-10T08:28:21.487
2015-03-10T15:59:59.746	2015-03-10T17:43:01.498
2015-03-10T18:33:35.749	2015-03-10T19:27:59.718
2015-03-11T11:08:47.768	2015-03-11T21:52:37.530
2015-03-13T04:11:43.783	2015-03-13T12:24:31.855
2015-03-13T14:05:19.826	2015-03-13T22:18:13.585
2015-03-14T04:08:31.842	2015-03-14T18:55:33.609
2015-03-15T01:24:47.898	2015-03-15T02:31:59.899
2015-03-15T03:39:11.900	2015-03-15T04:33:35.901
2015-03-15T12:55:01.630	2015-03-15T13:33:25.630
2015-03-16T00:00:37.642	2015-03-16T01:08:53.644
2015-03-16T03:08:21.646	2015-03-16T05:07:49.648
2015-03-16T07:41:25.651	2015-03-16T09:40:53.653
2015-03-16T16:17:35.911	2015-03-16T20:49:35.979
2015-03-17T02:20:15.985	2015-03-17T06:58:07.959
2015-03-17T14:08:05.686	2015-03-17T22:48:37.696
2015-03-18T02:13:25.700	2015-03-18T17:16:47.936
2015-03-18T18:33:36.000	2015-03-18T18:46:23.937
2015-03-19T00:56:00.007	2015-03-19T01:56:48.039
2015-03-19T02:22:23.977	2015-03-19T02:38:24.009
2015-03-19T03:58:24.011	2015-03-19T05:11:59.981
2015-03-19T07:35:28.046	2015-03-19T08:17:03.984
2015-03-19T21:27:59.999	2015-03-19T23:45:36.002
2015-03-21T04:07:28.097	2015-03-21T23:10:24.087
2015-03-22T00:49:36.089	2015-03-22T04:33:36.094
2015-03-22T07:02:24.128	2015-03-22T14:27:12.042
2015-03-22T17:05:36.108	2015-03-22T23:52:00.147
2015-03-23T04:57:41.840	2015-03-23T08:57:36.064
2015-03-26T00:01:36.167	2015-03-26T05:24:48.142
2015-03-26T07:35:28.144	2015-03-26T15:54:40.248
2015-03-26T19:01:52.158	2015-03-26T23:33:52.225
2015-03-27T16:00:32.282	2015-03-27T16:45:20.220
2015-03-27T17:26:56.253	2015-03-27T17:46:08.253
2015-03-28T22:12:48.287	2015-03-28T23:39:12.258
2015-04-06T12:19:26.242	2015-04-06T14:31:42.244
2015-04-06T16:43:58.247	2015-04-06T18:17:50.249
2015-04-08T17:59:36.555	2015-04-08T21:08:24.527
2015-04-08T23:11:36.530	2015-04-08T23:53:12.593
2015-04-09T00:03:26.312	2015-04-09T10:27:20.543
2015-04-09T19:45:44.617	2015-04-09T22:39:04.589
2015-04-10T00:01:18.341	2015-04-10T03:47:26.345
2015-04-10T07:37:44.568	2015-04-10T11:15:20.666
2015-04-10T14:35:20.577	2015-04-10T19:58:32.583
2015-04-11T03:11:36.685	2015-04-11T07:24:24.628
2015-04-11T10:43:26.382	2015-04-11T11:51:42.383
2015-04-11T15:20:08.700	2015-04-11T18:25:44.672
2015-04-12T01:37:12.680	2015-04-12T05:18:00.685
2015-04-12T10:01:12.659	2015-04-12T10:26:48.722
2015-04-12T10:49:12.660	2015-04-12T11:40:24.661
2015-04-12T14:30:00.664	2015-04-12T15:21:12.665
2015-04-12T19:58:00.702	2015-04-12T20:52:24.672
2015-04-16T01:18:00.797	2015-04-16T02:15:36.767
2015-04-16T08:58:48.775	2015-04-16T12:14:00.748
2015-04-17T00:28:56.762	2015-04-17T01:55:20.857
2015-04-17T04:05:28.766	2015-04-17T15:16:30.560
2015-04-18T16:59:20.809	2015-04-18T20:25:50.594
2015-04-18T21:34:00.814	2015-04-18T23:48:24.879
2015-04-19T00:03:26.598	2015-04-19T01:58:38.601
2015-04-19T03:29:12.915	2015-04-19T08:01:18.608
2015-04-19T08:52:24.890	2015-04-19T15:03:42.616
2015-04-19T16:50:22.618	2015-04-19T19:42:00.840
2015-04-19T21:40:24.905	2015-04-19T23:58:00.845
2015-04-24T07:43:05.028	2015-04-24T08:24:40.998
2015-04-24T09:25:28.999	2015-04-24T11:55:52.971
2015-04-24T14:02:17.036	2015-04-24T16:29:29.007
2015-04-24T21:59:05.045	2015-04-24T23:59:10.766
2015-04-26T07:02:01.021	2015-04-26T14:07:37.091
2015-04-26T23:13:45.071	2015-04-26T23:48:57.040
2015-04-27T17:34:33.061	2015-04-27T23:52:46.849
2015-12-15T11:15:34.630	2015-12-15T12:03:34.631
2015-12-19T07:28:22.768	2015-12-19T11:53:58.742
2015-12-19T14:59:34.745	2015-12-19T16:32:22.841
2015-12-23T21:44:54.927	2015-12-23T23:14:30.866
2015-12-24T00:18:30.899	2015-12-24T02:07:18.932
2015-12-24T05:48:44.672	2015-12-24T06:52:44.674
2015-12-24T13:25:16.681	2015-12-24T14:59:08.683
2015-12-24T17:32:06.919	2015-12-24T17:54:30.981
2015-12-25T17:05:27.008	2015-12-25T18:19:02.978
2015-12-25T20:33:26.981	2015-12-25T22:19:02.921
2016-01-04T04:57:27.241	2016-01-04T05:51:51.242
2016-01-04T07:27:51.244	2016-01-04T08:38:15.245
2016-01-07T20:21:43.342	2016-01-07T20:50:31.374
2016-01-07T22:39:19.282	2016-01-07T23:56:45.089
2016-01-08T00:01:01.089	2016-01-08T01:06:31.316
2016-01-08T05:12:23.321	2016-01-08T06:22:47.385
2016-01-08T11:39:35.328	2016-01-08T12:56:23.361
2016-01-08T14:03:03.300	2016-01-08T14:22:15.300
2016-01-08T15:55:03.302	2016-01-08T20:36:39.401
2016-01-08T21:31:03.371	2016-01-08T22:41:27.341
2016-01-09T06:01:59.350	2016-01-09T19:57:11.397
2016-01-09T21:18:15.399	2016-01-09T22:06:15.431
2016-01-10T00:52:39.434	2016-01-10T05:43:51.440
2016-01-10T17:02:15.421	2016-01-10T20:46:15.394
2016-01-11T00:27:03.368	2016-01-11T01:15:03.431
2016-01-11T03:31:03.465	2016-01-11T06:14:15.374
2016-01-11T07:35:25.182	2016-01-11T08:05:17.183
2016-01-11T08:28:39.377	2016-01-11T11:47:03.412
2016-01-11T20:44:45.198	2016-01-11T22:52:45.200
2016-01-12T00:14:47.426	2016-01-12T06:37:49.209
2016-01-12T09:17:11.406	2016-01-12T10:43:35.407
2016-01-12T12:38:47.409	2016-01-12T14:56:23.412
2016-01-12T16:19:35.414	2016-01-12T18:01:59.447
2016-01-12T19:29:59.417	2016-01-12T22:41:59.484
2016-01-13T03:02:21.233	2016-01-13T03:36:29.234
2016-01-13T07:04:23.431	2016-01-13T10:25:59.435
2016-01-13T12:49:59.437	2016-01-13T16:43:35.442
2016-01-13T17:12:23.442	2016-01-13T20:27:41.254
2016-01-13T21:32:07.479	2016-01-13T22:20:07.511
2016-01-13T23:14:31.449	2016-01-13T23:56:45.258
2016-01-14T00:12:07.513	2016-01-14T01:22:31.514
2016-01-14T02:36:07.453	2016-01-14T05:03:19.519
2016-01-14T05:38:31.488	2016-01-14T06:10:31.520
2016-01-14T17:32:07.502	2016-01-14T23:58:53.286
2016-01-15T00:03:09.286	2016-01-15T12:53:11.493
2016-01-15T14:46:21.304	2016-01-15T16:24:29.306
2016-01-15T20:02:05.310	2016-01-15T21:06:05.311
2016-01-15T21:53:01.312	2016-01-15T22:27:09.313
2016-01-16T00:01:01.315	2016-01-16T23:54:37.343
2016-01-17T02:23:57.346	2016-01-17T07:31:09.352
2016-01-17T09:47:41.354	2016-01-17T11:30:05.356
2016-01-17T14:03:41.359	2016-01-17T17:58:21.364
2016-01-17T18:36:45.365	2016-01-17T19:53:33.366
2016-01-17T22:27:09.369	2016-01-17T23:09:49.370
2016-01-18T03:00:13.375	2016-01-18T23:16:13.398
2016-01-19T03:23:41.403	2016-01-19T11:21:33.413
2016-01-19T12:29:49.414	2016-01-19T13:55:09.416
2016-01-19T14:59:09.417	2016-01-19T18:11:09.421
2016-01-19T19:17:11.612	2016-01-19T23:56:45.402
2016-01-20T00:47:57.403	2016-01-20T04:04:13.407
2016-01-20T05:03:57.409	2016-01-20T07:16:13.411
2016-01-20T08:11:41.412	2016-01-20T23:58:53.431
2016-01-21T00:03:09.431	2016-01-21T06:39:57.439
2016-01-21T08:30:53.441	2016-01-21T15:11:57.449
2016-01-21T17:35:19.733	2016-01-21T23:56:45.460
2016-01-22T00:01:01.460	2016-01-22T23:41:49.488
2016-01-24T00:05:17.517	2016-01-24T07:29:01.526
2016-01-24T08:37:17.527	2016-01-24T13:06:05.532
2016-01-24T19:30:05.540	2016-01-24T23:58:53.545
2016-01-25T03:40:39.831	2016-01-25T08:09:27.774
2016-01-25T10:11:03.776	2016-01-25T11:53:27.778
2016-01-25T16:06:47.846	2016-01-25T20:23:25.000
2016-01-26T01:43:25.576	2016-01-26T23:50:21.602
2016-01-27T02:06:53.605	2016-01-27T04:23:25.608
2016-01-27T06:32:23.923	2016-01-27T23:52:29.631
2016-01-28T00:01:01.631	2016-01-28T00:01:01.631
2016-01-28T00:01:01.631	2016-01-28T07:29:01.640
2016-01-28T10:11:09.643	2016-01-28T11:19:25.645
2016-01-28T12:06:21.645	2016-01-28T22:33:33.658
2016-01-29T01:24:13.661	2016-01-29T02:23:57.663
2016-01-29T06:41:59.910	2016-01-29T06:54:47.973
2016-01-29T07:58:47.974	2016-01-29T23:01:17.687
2016-01-30T02:09:01.691	2016-01-30T03:21:33.692
2016-01-30T12:10:37.703	2016-01-30T15:09:49.706
2016-01-30T20:55:25.713	2016-01-30T23:58:53.717
2016-01-31T00:03:09.717	2016-01-31T05:56:39.996
2016-01-31T10:34:37.729	2016-01-31T11:04:29.730
2016-01-31T14:12:13.734	2016-01-31T15:37:33.735
2016-01-31T16:37:17.737	2016-01-31T21:40:13.743
2016-02-01T03:11:51.958	2016-02-01T03:59:51.959
2016-02-01T06:20:39.961	2016-02-01T11:05:27.998
2016-02-01T23:20:24.075	2016-02-01T23:52:23.982
2016-02-04T00:03:09.831	2016-02-04T05:32:08.106
2016-02-04T06:48:29.839	2016-02-04T09:47:41.843
2016-02-04T16:20:13.851	2016-02-04T16:45:49.851
2016-02-04T18:00:56.152	2016-02-04T23:46:32.127
2016-02-05T00:01:01.860	2016-02-05T02:55:57.863
2016-02-05T04:02:00.132	2016-02-05T12:53:12.142
2016-02-05T14:06:16.175	2016-02-05T23:41:49.888
2016-02-06T01:32:45.890	2016-02-06T05:18:53.895
2016-02-06T06:27:32.100	2016-02-06T10:30:48.902
2016-02-06T12:06:48.107	2016-02-06T21:40:13.914
2016-02-07T00:56:29.918	2016-02-07T06:07:57.924
2016-02-07T11:27:57.930	2016-02-07T12:44:45.932
2016-02-08T03:02:16.214	2016-02-08T06:14:16.218
2016-02-08T06:52:40.219	2016-02-08T07:15:04.156
2016-02-08T08:47:52.221	2016-02-08T10:14:16.222
2016-02-08T11:05:28.223	2016-02-08T13:33:49.961
2016-02-08T20:27:41.957	2016-02-08T23:56:45.961
2016-02-09T00:01:01.961	2016-02-09T00:01:01.961
2016-02-09T00:09:33.961	2016-02-09T01:44:24.213
2016-02-09T04:24:24.247	2016-02-09T17:07:36.231
2016-02-09T18:47:25.983	2016-02-09T23:24:45.988
2016-02-10T01:02:53.990	2016-02-10T02:58:05.992
2016-02-10T04:06:21.993	2016-02-10T09:06:00.000
2016-02-11T12:53:18.031	2016-02-11T14:10:06.033
2016-02-11T17:00:46.036	2016-02-11T21:57:44.260
2016-02-12T00:15:20.263	2016-02-12T02:39:20.359
2016-02-12T04:02:00.330	2016-02-12T05:02:48.268
2016-02-12T05:28:24.300	2016-02-12T09:38:00.274
2016-02-12T11:20:24.276	2016-02-12T12:34:00.340
2016-02-12T13:50:54.060	2016-02-12T15:23:04.343
2016-02-12T17:08:40.345	2016-02-12T17:47:04.314
2016-02-12T18:09:28.377	2016-02-12T23:48:14.071
2016-02-13T00:35:10.072	2016-02-13T01:56:14.074
2016-02-13T06:02:00.329	2016-02-13T15:15:36.339
2016-02-13T18:46:48.343	2016-02-13T19:54:00.344
2016-02-14T07:27:52.327	2016-02-14T10:55:52.330
2016-02-14T12:15:52.363	2016-02-14T15:53:28.336
2016-02-14T17:05:28.400	2016-02-14T22:19:04.406
2016-02-14T23:13:28.345	2016-02-14T23:26:16.407
2016-02-15T00:01:02.127	2016-02-15T10:58:06.139
2016-02-15T18:00:30.148	2016-02-15T19:08:46.149
2016-02-15T20:29:50.150	2016-02-15T21:46:38.152
2016-02-16T02:35:36.439	2016-02-16T08:08:24.445
2016-02-16T09:17:12.384	2016-02-16T18:11:36.425
2016-02-16T19:17:12.395	2016-02-16T23:04:24.462
2016-02-18T00:03:10.210	2016-02-18T01:12:56.430
2016-02-18T16:07:26.228	2016-02-18T23:01:44.549
2016-02-20T00:24:30.265	2016-02-20T01:28:30.267
2016-02-20T05:18:54.271	2016-02-20T13:04:24.499
2016-02-20T17:58:22.286	2016-02-20T20:19:10.288
2016-02-20T21:02:16.570	2016-02-20T23:56:46.292
2016-02-21T00:01:02.292	2016-02-21T00:01:02.292
2016-02-21T00:01:02.293	2016-02-21T05:53:28.518
2016-02-21T10:15:26.304	2016-02-21T23:58:54.320
2016-02-22T00:07:26.320	2016-02-22T23:56:46.348
2016-02-23T00:30:54.348	2016-02-23T09:24:14.359
2016-02-23T12:03:36.612	2016-02-23T12:35:36.612
2016-02-23T13:46:00.614	2016-02-23T23:29:02.375
2016-02-24T03:27:58.379	2016-02-24T04:14:54.380
2016-02-24T05:23:10.382	2016-02-24T23:56:46.403
2016-02-25T00:01:02.403	2016-02-25T06:10:32.629
2016-02-25T07:41:50.412	2016-02-25T15:01:18.420
2016-02-25T15:35:26.421	2016-02-25T16:09:34.422
2016-02-25T16:35:10.422	2016-02-25T23:58:54.431
2016-02-26T00:03:10.431	2016-02-26T02:10:32.746
2016-02-26T05:50:48.750	2016-02-26T08:52:48.753
2016-02-28T02:09:28.738	2016-02-28T02:54:16.770
2016-02-28T17:59:52.725	2016-02-28T23:26:16.794
2016-02-29T00:22:22.827	2016-02-29T01:30:38.734
2016-02-29T05:39:04.801	2016-02-29T07:34:16.803
2016-02-29T08:50:06.524	2016-02-29T11:23:42.527
2016-02-29T18:00:30.534	2016-02-29T21:59:26.539
2016-03-03T00:15:20.851	2016-03-03T01:35:20.821
2016-03-03T03:59:20.855	2016-03-03T04:34:32.825
2016-03-03T05:06:32.856	2016-03-03T05:41:44.857
2016-03-03T14:33:34.613	2016-03-03T16:45:50.616
2016-03-03T20:57:34.621	2016-03-03T22:05:50.622
2016-03-04T03:17:18.628	2016-03-04T05:12:30.630
2016-03-04T11:10:48.860	2016-03-04T12:56:24.925
2016-03-04T14:03:04.863	2016-03-04T23:58:54.652
2016-03-05T00:20:14.652	2016-03-05T01:58:22.654
2016-03-05T04:10:38.656	2016-03-05T12:19:36.952
2016-03-05T13:04:24.984	2016-03-05T23:48:40.934
2016-03-08T01:18:48.991	2016-03-08T09:28:30.745
2016-03-08T11:10:48.971	2016-03-08T17:04:30.754
2016-03-08T19:17:13.074	2016-03-08T23:07:37.048
2016-03-09T11:26:48.999	2016-03-09T15:10:49.004
2016-03-09T16:21:13.068	2016-03-09T16:59:37.037
2016-03-09T17:28:25.069	2016-03-09T20:08:25.103
2016-03-09T21:35:21.011	2016-03-09T23:56:14.790
2016-03-12T06:53:13.109	2016-03-12T23:07:05.190
2016-03-13T00:02:38.873	2016-03-13T09:55:42.884
2016-03-13T10:51:10.885	2016-03-13T23:56:14.900
2016-03-14T00:00:30.900	2016-03-14T00:00:30.900
2016-03-14T00:04:46.900	2016-03-14T07:49:50.909
2016-03-18T00:00:31.011	2016-03-18T14:22:23.027
2016-03-18T15:47:43.029	2016-03-18T19:55:11.034
2016-03-18T22:20:15.036	2016-03-18T23:07:11.037
2016-03-21T00:02:39.094	2016-03-21T02:23:27.096
2016-03-21T03:05:29.355	2016-03-21T23:56:15.121
2016-03-22T00:04:47.121	2016-03-22T23:58:23.149
2016-03-23T00:09:03.149	2016-03-23T01:00:15.150
2016-03-23T03:44:31.153	2016-03-23T15:58:49.487
2016-03-23T22:48:57.402	2016-03-23T23:56:15.176
2016-03-25T00:02:39.204	2016-03-25T11:03:59.217
2016-03-25T12:42:07.219	2016-03-25T14:50:07.221
2016-03-25T19:18:55.226	2016-03-25T20:23:53.548
2016-04-07T18:26:33.849	2016-04-07T19:24:09.819
2016-04-07T22:37:19.589	2016-04-07T23:11:27.590
2016-04-08T03:27:27.595	2016-04-08T04:10:07.595
2016-04-08T07:58:49.927	2016-04-08T08:30:49.865
2016-04-13T00:06:23.729	2016-04-13T23:59:59.756
2016-04-18T00:04:15.867	2016-04-18T23:57:51.895
2016-04-19T00:02:07.895	2016-04-19T19:22:39.917
2016-05-06T19:50:24.417	2016-05-06T22:36:48.420
2016-05-12T03:52:32.567	2016-05-12T05:34:56.569
2016-05-12T06:56:00.571	2016-05-12T08:46:56.573
2016-05-12T10:29:20.575	2016-05-12T11:58:56.577
2016-05-12T15:06:40.581	2016-05-12T23:55:44.591
2016-05-13T00:00:00.591	2016-05-13T03:37:36.595
2016-05-13T04:07:28.596	2016-05-13T17:04:00.611
2016-05-13T17:59:28.612	2016-05-13T23:57:52.619
2016-06-01T12:16:00.000	2016-06-01T20:02:19.422
2016-06-01T21:31:55.424	2016-06-01T23:56:33.155
2016-06-15T00:20:01.522	2016-06-15T04:48:49.528
2016-06-15T06:32:11.774	2016-06-15T20:10:25.546
2016-06-15T20:48:49.546	2016-06-15T22:16:43.761
2016-06-16T00:00:49.550	2016-06-16T00:22:09.551
2016-07-09T12:43:24.424	2016-07-09T14:25:48.426
2016-07-09T15:52:18.459		2016-07-09T17:51:46.211
